# Supplementary material for: The impact of social support and self- efficacy on resilience in nurses exposed to workplace violence: a cross-sectional study in Southwest China
Source: Research Square preprint supplement (doi:10.21203/rs.3.rs-7879963/v1), 2025-11-24
Supplement: Supplementary file 1 [file cb04e13bd71f2c6226d52d95.docx]

| **Table1 Characteristics of Nursing Personnel Experiencing WPV（n=315）** | | | |
| --- | --- | --- | --- |
|  | | No. | 百分比（%） |
| Gender | Males | 25 | 7.9% |
| Females | 290 | 92.1% |
| City | Capital | 163 | 51.7% |
|  | Prefecture-level city | 152 | 48.3% |
| Age | 20～30 | 165 | 52.4% |
| 31～40 | 102 | 32.4% |
| 41～50 | 40 | 12.7% |
| ＞50 | 8 | 2.5% |
| Marital status | Single | 96 | 30.5% |
| Married | 209 | 66.3% |
| Divorced, separated | 10 | 3.2% |
| Education level | Less than junior college | 4 | 1.3% |
| Junior college | 69 | 21.9% |
| Undergraduate | 242 | 76.8% |
| Working years | Less than 5 years | 94 | 29.8% |
| 6-10 years | 102 | 32.4% |
| 11～20 years | 89 | 28.3% |
| More than 21 years | 30 | 9.5% |
| Position | None | 265 | 84.1% |
| Group leader | 46 | 14.6% |
| Head nurse | 4 | 1.3% |
| Professional title | Primary | 71 | 22.5% |
| Intermediate | 220 | 69.8% |
| Senior | 24 | 7.6% |
| Department | Pediatrics | 37 | 11.7% |
| Obstetrics and Gynecology | 26 | 8.3% |
| Internal Medicine | 67 | 21.3% |
| Surgery | 44 | 14.0% |
| Rehabilitation Department | 9 | 2.9% |
| Neurosurgery | 10 | 3.2% |
| Orthopaedics | 10 | 3.2% |
| Geriatric | 11 | 3.4% |
| Otorhinolaryngology | 5 | 1.6% |
| Traditional Chinese Medicine | 26 | 8.3% |
| ICU | 6 | 1.9% |
| Oncology department  and Immunology | 2 | 0.6% |
| General department | 62 | 19.6% |

| **Table2 The situation of nursing staff Experiencing WPV（n=315）** | | | |
| --- | --- | --- | --- |
| 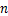 | Frequency (Times) | Number | Constituent ratio (%) |
| Language attack | 0 | 10 | 3.2 |
| 1 | 166 | 52.7 |
| 2～3 | 86 | 27.3 |
| ＞3 | 53 | 16.8 |
| Threaten | 0 | 210 | 66.7 |
| 1 | 72 | 22.9 |
| 2～3 | 18 | 5.7 |
| ＞3 | 15 | 4.8 |
| Somatic attack | 0 | 284 | 90.2 |
| 1 | 21 | 6.7 |
| 2～3 | 4 | 1.3 |
| ＞3 | 6 | 1.9 |
| Sexual harassment | 0 | 289 | 91.7 |
| 1 | 14 | 4.4 |
| 2～3 | 9 | 2.9 |
| ＞3 | 3 | 1.0 |

Table 3 Correlation analysis of Self-efficacy, resilience and Social support

|  | Gender | AG | MS | City | WY | PT | P | HG | EL | SE | SR |
| --- | --- | --- | --- | --- | --- | --- | --- | --- | --- | --- | --- |
| Gender | 1 |  |  |  |  |  |  |  |  |  |  |
| AG | .197** | 1 |  |  |  |  |  |  |  |  |  |
| MS | .279** | .501** | 1 |  |  |  |  |  |  |  |  |
| City | .260** | -.099 | .006 | 1 |  |  |  |  |  |  |  |
| WY | .297** | .819** | .553** | -.083 | 1 |  |  |  |  |  |  |
| PT | .273** | .651** | .419** | .011 | .739** | 1 |  |  |  |  |  |
| P | .038 | .258** | .162** | .017 | .300** | .334** | 1 |  |  |  |  |
| HG | .069 | -.137* | -.049 | -.001 | -.190** | -.199** | .057 | 1 |  |  |  |
| EL | -.003 | -.049 | -.081 | .085 | .039 | .243** | .071 | -.174** | 1 |  |  |
| SE | .083 | .060 | .062 | .146** | .073 | .108 | .072 | -.093 |  | 1 |  |
| SR | .026 | .061 | .158** | .058 | .084 | .039 | .072 | -.078 |  | .409** | 1 |
| SS | .163** | .143* | .347** | .011 | .168** | .176** | .142* | .037 |  | .224** | .426** |

AG: age-group; MS: Marital status; WY: Working years; PT: Professional title; P: Position; HG: Hospital grade; EL: Education Level; SE: Self-efficacy; SS: Social support. *Significantly correlated at the 0.05; **Significantly correlated at the 0.01.
